# Supplementary material for: Apoptosis induction and cell cycle arrest induced by Sinkiangenone B, a novel phenylpropanoid derivative from the resin of Ferula sinkiangensis K. M. Shen
Source: Royal Society of Chemistry journal article supplement (doi:10.1039/c7ra13716h), 2018-01-01

**Apoptosis induction and cell cycle arrest induced by  
Sinkiangenone B, a novel phenylpropanoid derivative from  
the resin of *Ferula sinkiangensis* K. M. Shen**

Junchi Wang,<sup>a</sup> Yuan Gao,<sup>a</sup> Huijuan Wang,<sup>a</sup> Lihua Chen,<sup>a</sup> Li Cao,<sup>a</sup> Jianguo Xu,<sup>b</sup>  
Xiaojin Li,<sup>b</sup> Yaqin Zhao,<sup>b</sup> Jun Zhu<sup>b</sup> and Jianyong Si<sup>\*a</sup>

<sup>a</sup> *The Key Laboratory of Bioactive Substances and Resources Utilization of Chinese Herbal Medicine, Ministry of Education, Institute of Medicinal Plant Development, Chinese Academy of Medical Sciences & Peking Union Medical College, Beijing 100193, P. R. China. E-mail: Jianyongsi1963@126.com; Tel: +86-010-57833299*

<sup>b</sup> *Xinjiang Institute of Chinese Materia Medica and Ethical Materia Medica, Urumqi 830002, P.R. China*

## Contents

### **MS, UV, IR and NMR Spectra of Compound 1**

Figure S1. HR-ESI-MS spectrum of 1

Figure S2. IR spectrum of 1

Figure S3. UV spectrum in MeOH of 1

Figure S4.  $^1\text{H}$ -NMR spectrum (MeOD, 600 MHz) of 1

Figure S5.  $^{13}\text{C}$ -NMR spectrum (MeOD, 125 MHz) of 1

Figure S6.  $^1\text{H}$ - $^1\text{H}$  COSY spectrum (MeOD) of 1

Figure S7. HSQC spectrum (MeOD) of 1

Figure S8. HMBC spectrum (MeOD) of 1

### **MS, UV, IR and NMR Spectra of Compound 2**

Figure S9. HR-ESI-MS spectrum of 2

Figure S10. IR spectrum of 2

Figure S11. UV spectrum in MeOH of 2

Figure S12.  $^1\text{H}$ -NMR spectrum (MeOD, 600 MHz) of 2

Figure S13.  $^{13}\text{C}$ -NMR spectrum (MeOD, 125 MHz) of 2

Figure S14.  $^1\text{H}$ - $^1\text{H}$  COSY spectrum (MeOD) of 2

Figure S15. HSQC spectrum (MeOD) of 2

Figure S16. HMBC spectrum (MeOD) of 2

### **MS, UV, IR and NMR Spectra of Compound 4**

Figure S17. HR-ESI-MS spectrum of 4

Figure S18. IR spectrum of 4

Figure S19. UV spectrum in MeOH of 4

Figure S20.  $^1\text{H}$ -NMR spectrum (MeOD, 600 MHz) of 4

Figure S21.  $^{13}\text{C}$ -NMR spectrum (MeOD, 125 MHz) of 4

Figure S22.  $^1\text{H}$ - $^1\text{H}$  COSY spectrum (MeOD) of 4

Figure S23. HSQC spectrum (MeOD) of 4

Figure S24. HMBC spectrum (MeOD) of 4

### **MS, UV, IR and NMR Spectra of Compound 5**

Figure S25. HR-ESI-MS spectrum of 5

Figure S26. IR spectrum of 5

Figure S27. UV spectrum in MeOH of 5

Figure S28.  $^1\text{H}$ -NMR spectrum (MeOD, 600 MHz) of 5

Figure S29.  $^{13}\text{C}$ -NMR spectrum (MeOD, 125 MHz) of 5

# MS, UV, IR and NMR Spectra of 1

Figure S1. HR-ESI-MS spectrum of 1

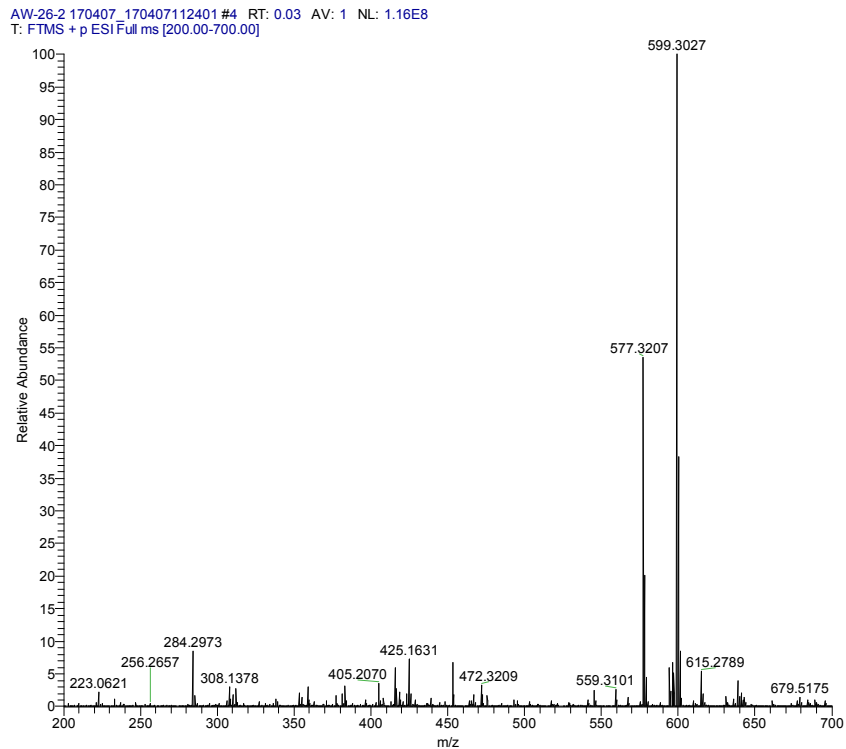

Figure S2. IR spectrum of 1

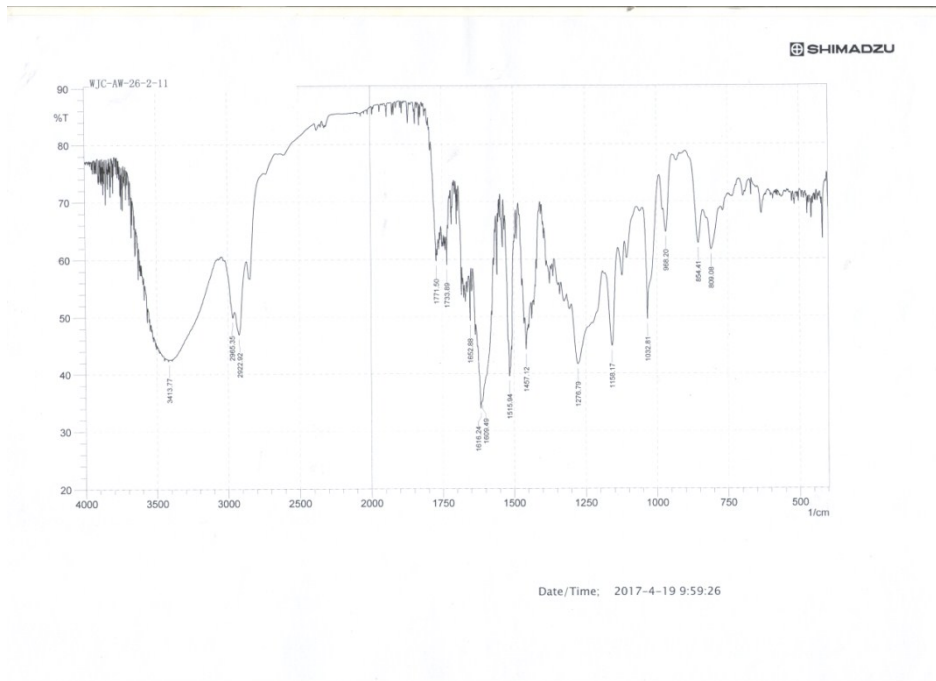

Figure S3. UV spectrum in MeOH of 1

**Auto Print Report 1**

2017-04-13 14:59:14

Data Set: Storage 145630 - RawData - D:\2017WJC-AW-26-2-1.spc

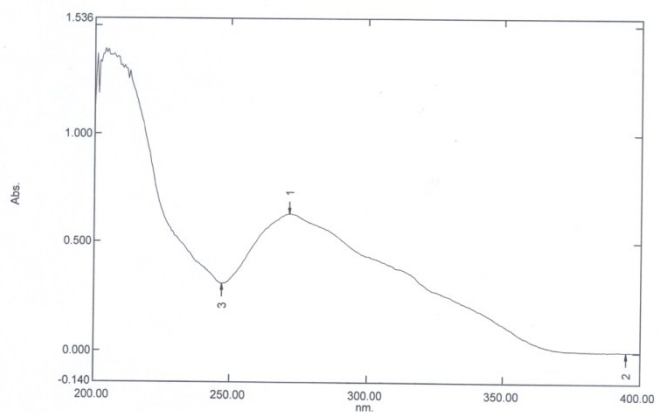

| No. | P/V | Wavelength | Abs.  | Description |
|-----|-----|------------|-------|-------------|
| 1   | ⊕   | 271.50     | 0.633 |             |

Measurement Properties  
Wavelength Range (nm.): 200.00 to 400.00  
Scan Speed: Medium  
Sampling Interval: 0.5  
Auto Sampling Interval: Disabled  
Scan Mode: Single

Sample Preparation Properties  
Weight:  
Volume:

Figure S4. <sup>1</sup>H-NMR spectrum (MeOD, 600 MHz) of 1

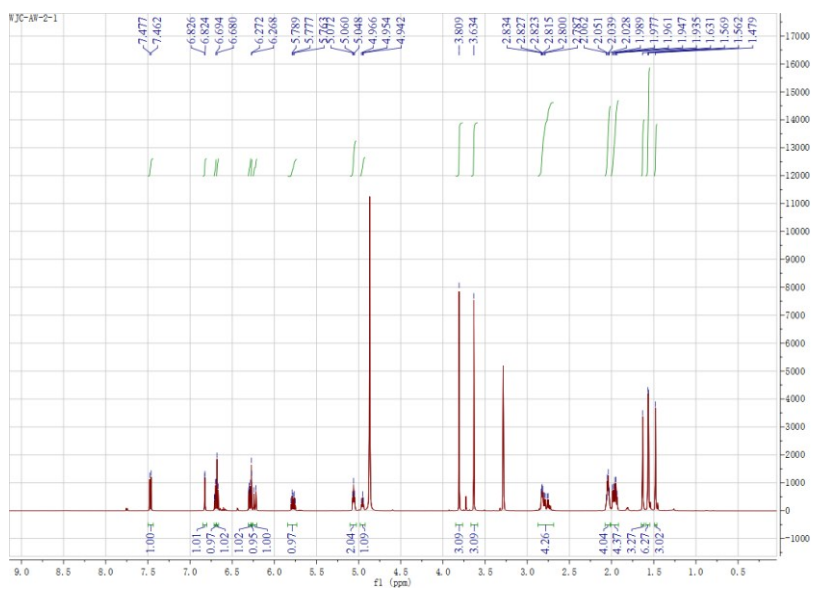

Figure S5.  $^{13}\text{C}$ -NMR spectrum (MeOD, 125 MHz) of 1

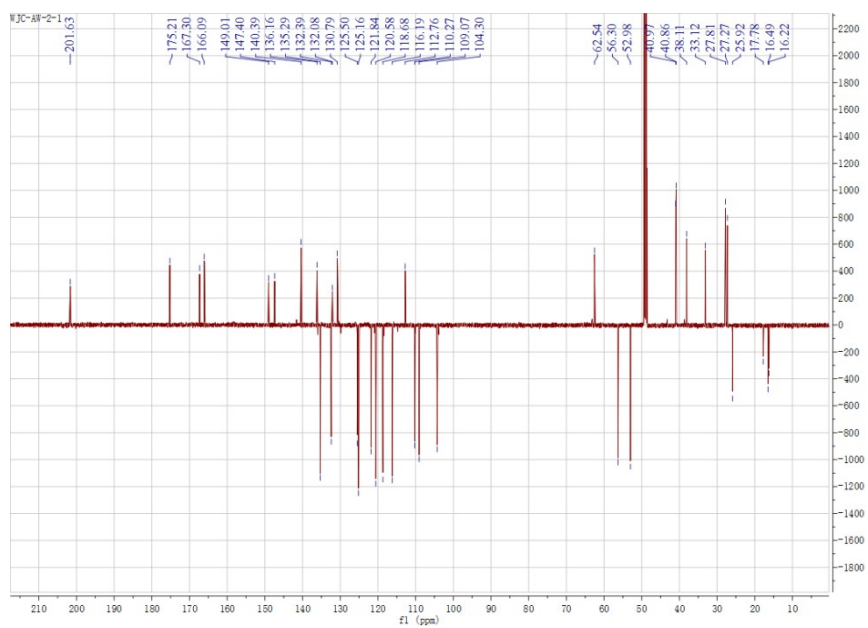



Figure S6.  $^1\text{H}$ - $^1\text{H}$  COSY spectrum (MeOD) of 1

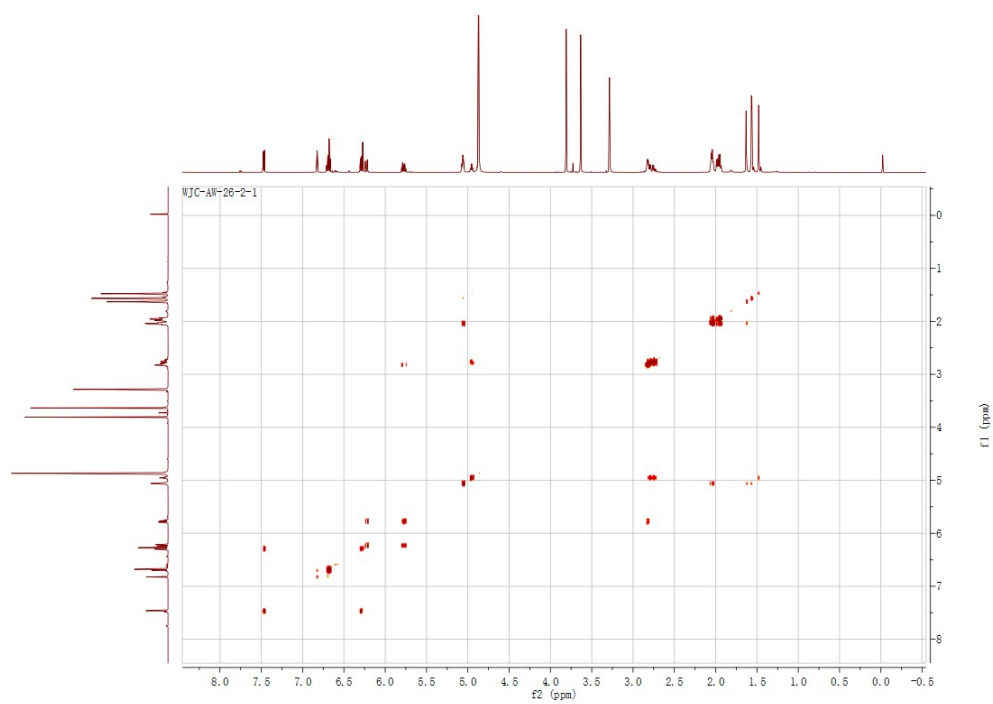

Figure S7. HSQC spectrum (MeOD) of 1

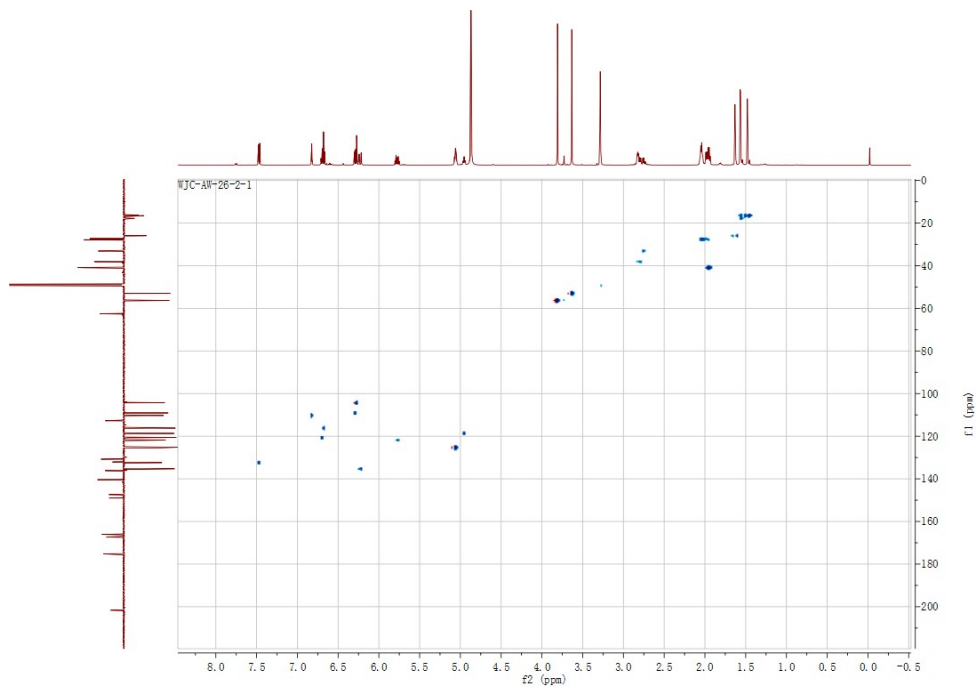

Figure S8. HMBC spectrum (MeOD) of 1

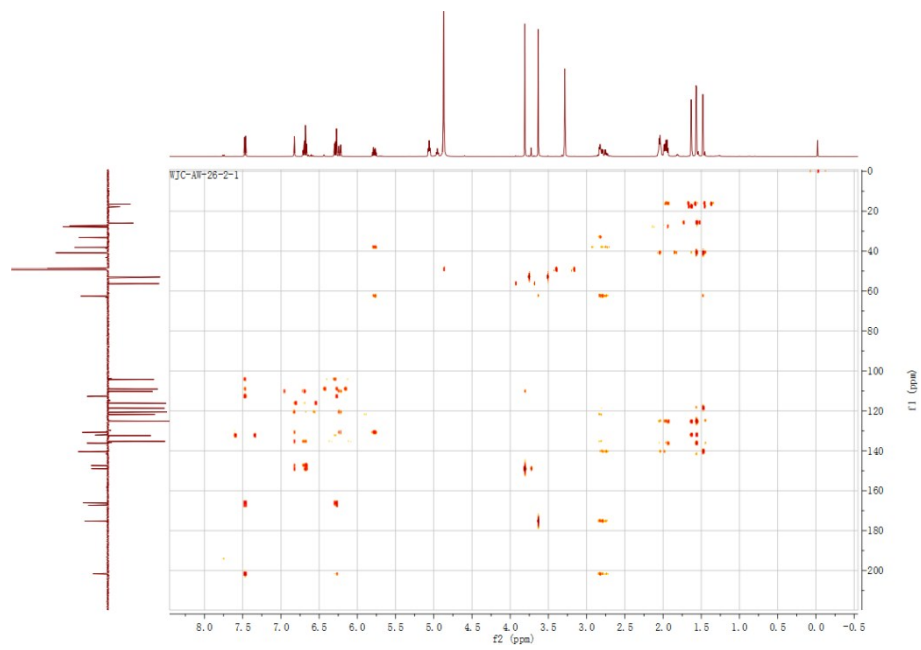

# MS, UV, IR and NMR Spectra of Compound 2

## Figure S9. HR-ESI-MS spectrum of 2

AW-26-3 170407\_170407112401 #1 RT: 0.00 AV: 1 NL: 3.86E7  
T: FTMS + p ESI Full ms [200.00-700.00]

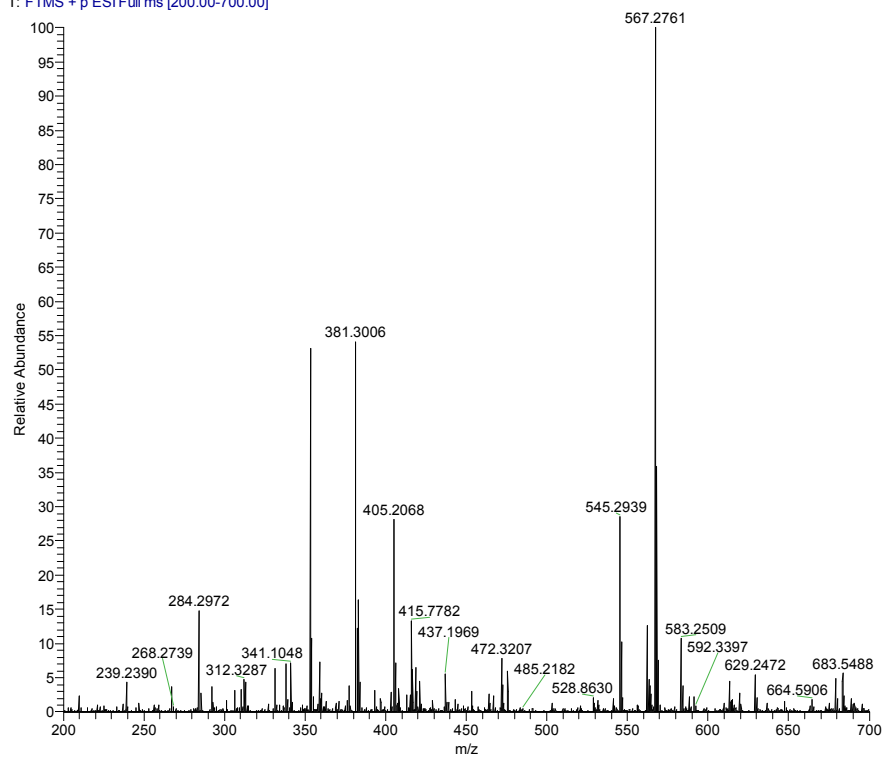

Figure S10. IR spectrum of 2

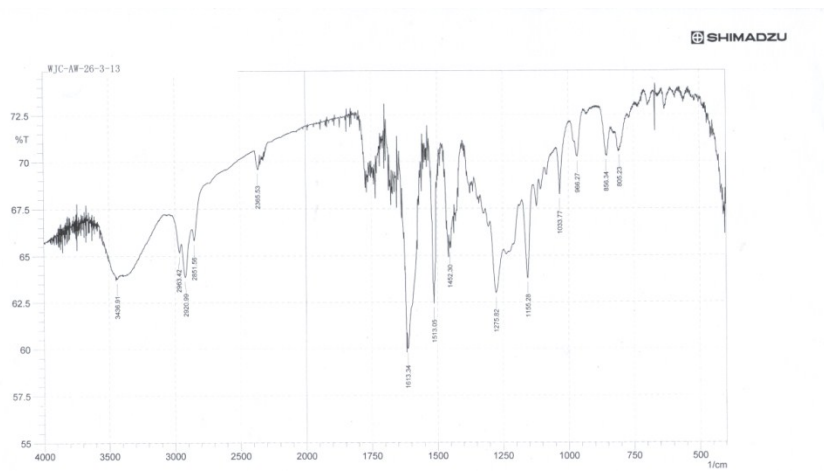

Date/Time: 2017-4-24 15:06:25

Figure S11. UV spectrum in MeOH of 2

### Spectrum Peak Pick Report

2017-04-24 10:06:13

Data Set: Storage 100343 - RawData - D:\2017WJC-AW-26-3-1.spc

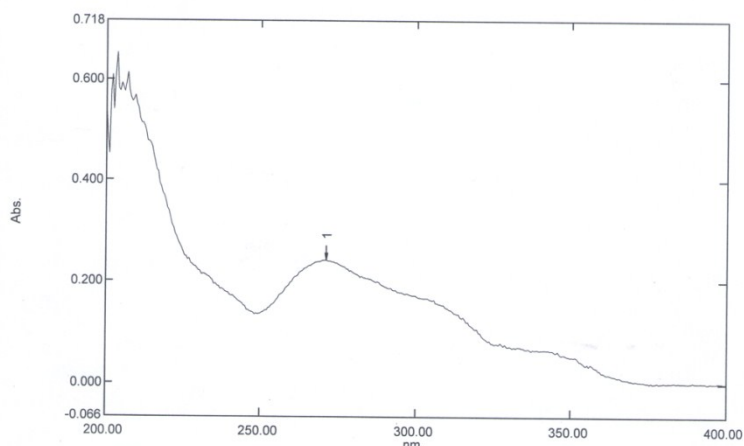

Measurement Properties  
Wavelength Range (nm.): 200.00 to 400.00  
Scan Speed: Medium  
Sampling Interval: 0.5  
Auto Sampling Interval: Disabled  
Scan Mode: Single

| No. | P/V | Wavelength | Abs.  | Description |
|-----|-----|------------|-------|-------------|
| 1   | ⊕   | 271.00     | 0.243 |             |

Sample Preparation Properties  
Weight:  
Volume:  
Dilution:  
Path Length:  
Additional Information:

Instrument Properties  
Instrument Type: UV-2500PC Series  
Measuring Mode: Absorbance  
Slit Width: 1.0 nm  
Light Source Change Wavelength: 360.0 nm  
S/R Exchange: Normal

Attachment Properties  
Attachment: 6-Cell  
Number of cells: 6

Figure S12. <sup>1</sup>H-NMR spectrum (MeOD, 600 MHz) of 2

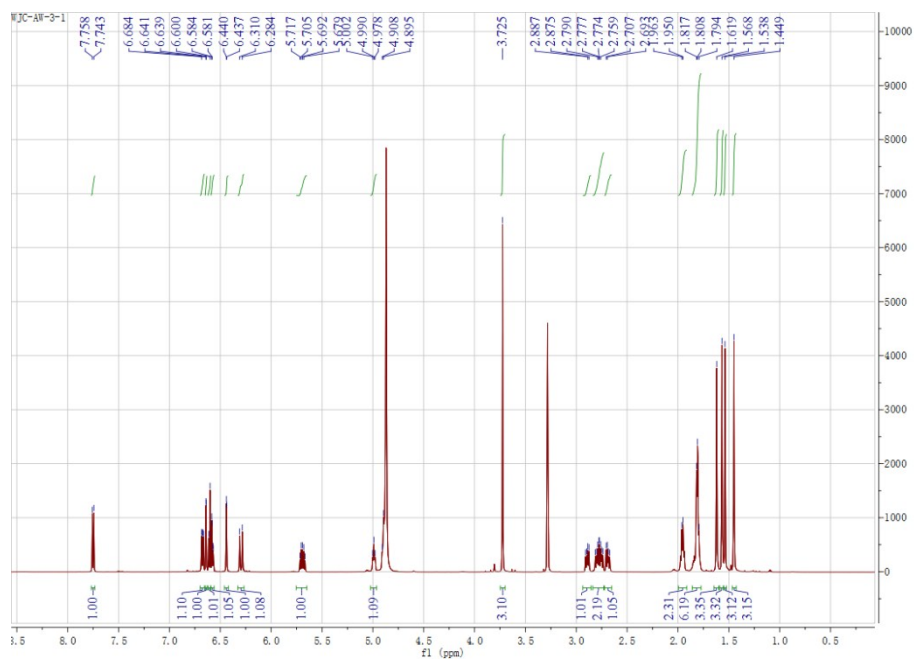

Figure S13.  $^{13}\text{C}$ -NMR spectrum (MeOD, 125 MHz) of 2

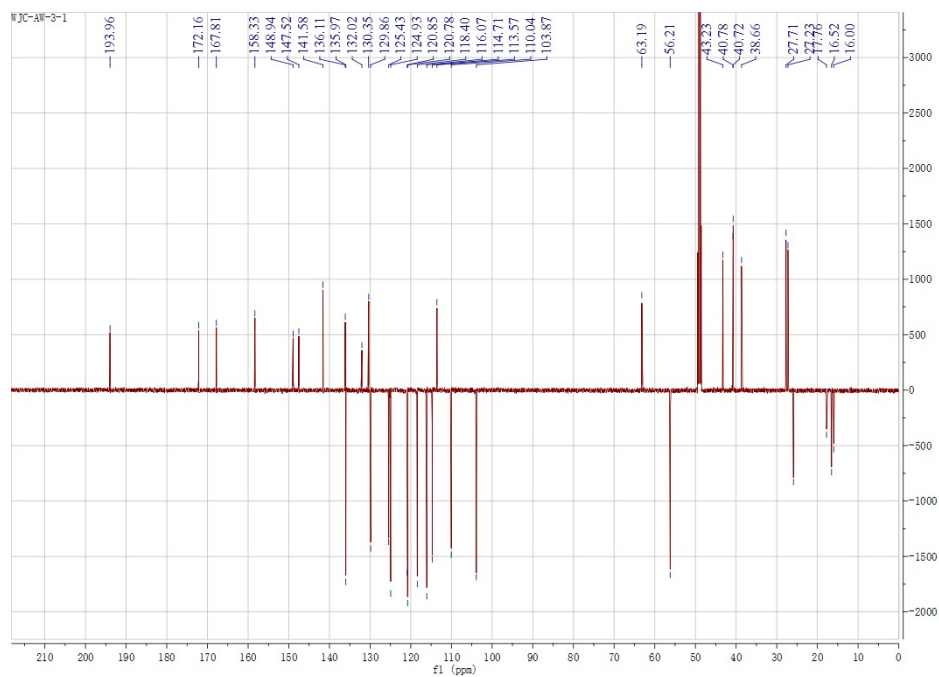



Figure S14.  $^1\text{H}$ - $^1\text{H}$  COSY spectrum (MeOD) of 2

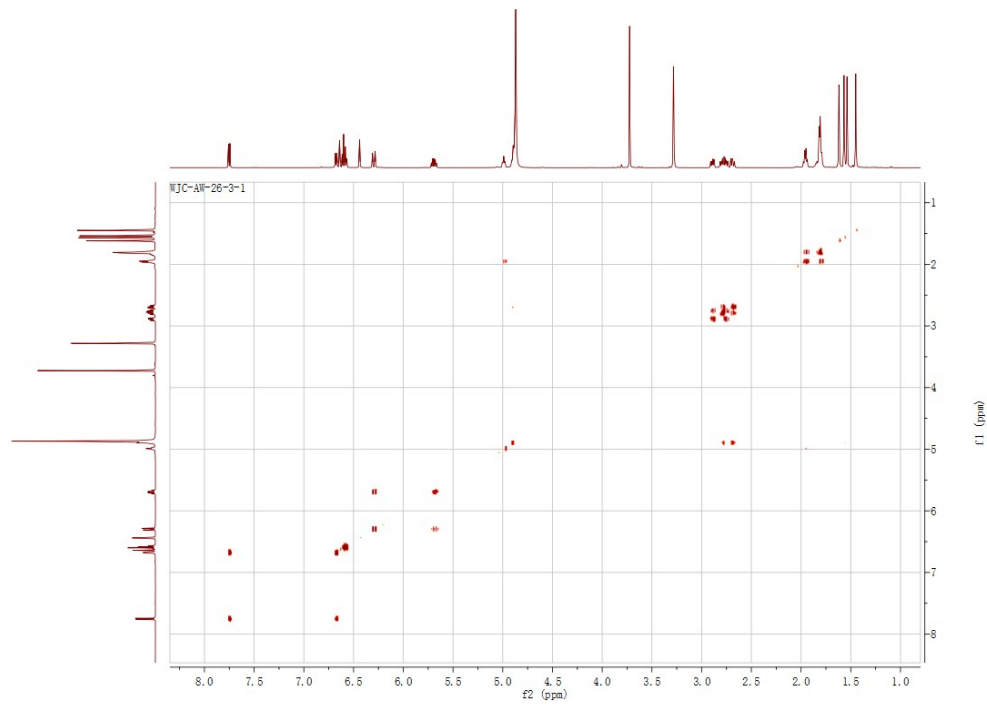

Figure S15. HSQC spectrum (MeOD) of 2

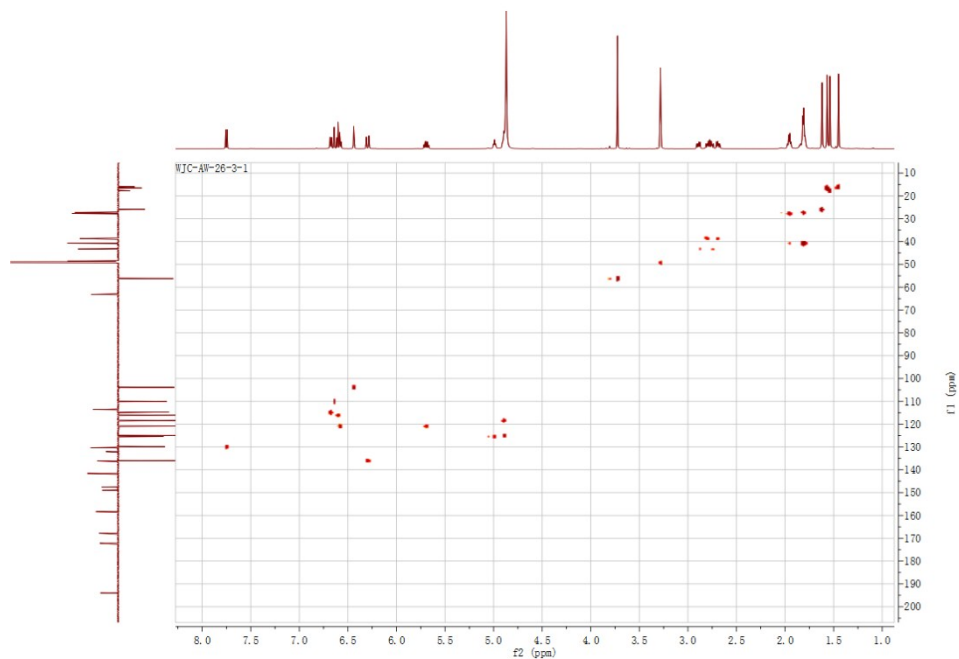

Figure S16. HMBC spectrum (MeOD) of 2

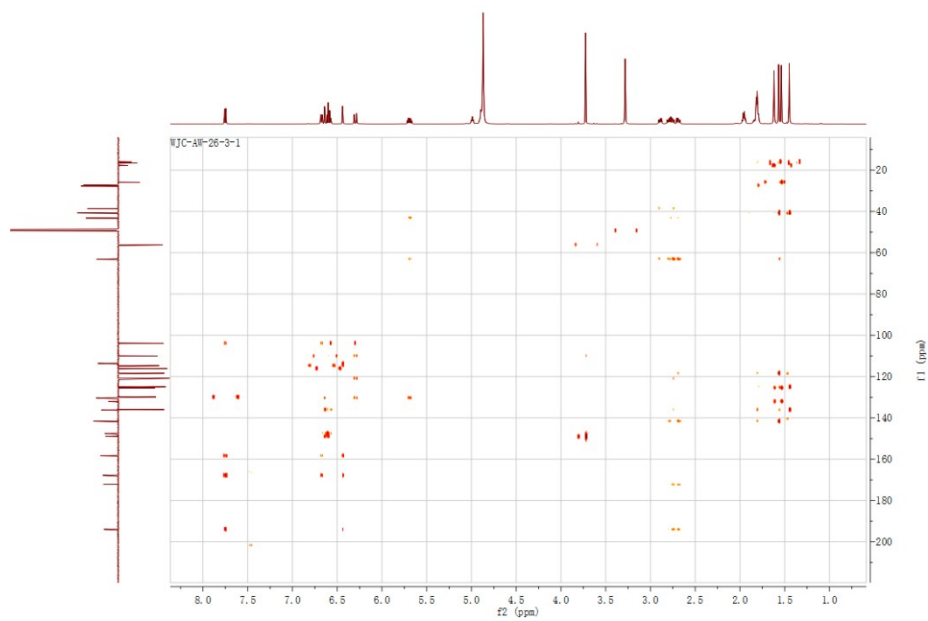

# MS, UV, IR and NMR Spectra of Compound 4

Figure S17. HR-ESI-MS spectrum of 4

AW-57\_170407112401 #6 RT: 0.04 AV: 1 NL: 3.70E7  
T: FTMS + p ESI Full ms [50.00-500.00]

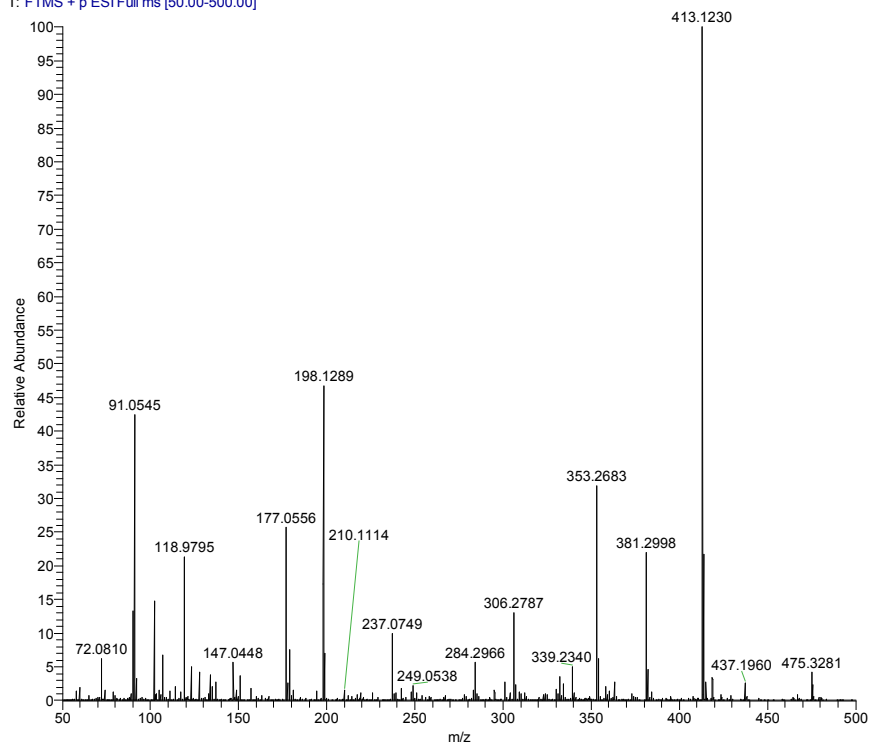

Figure S18. IR spectrum of 4

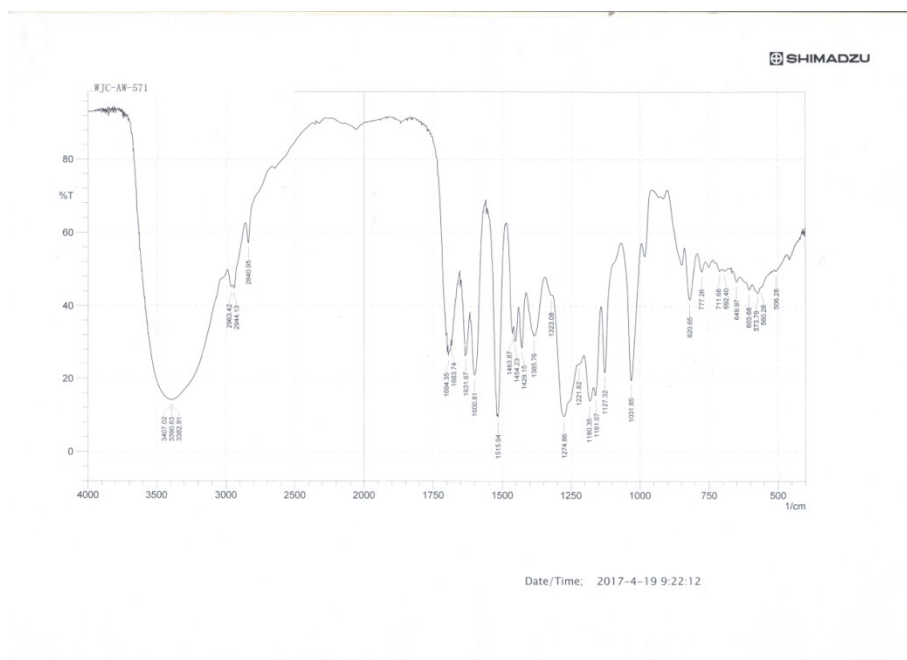



Figure S20.  $^1\text{H-NMR}$  spectrum (MeOD, 600 MHz) of 4

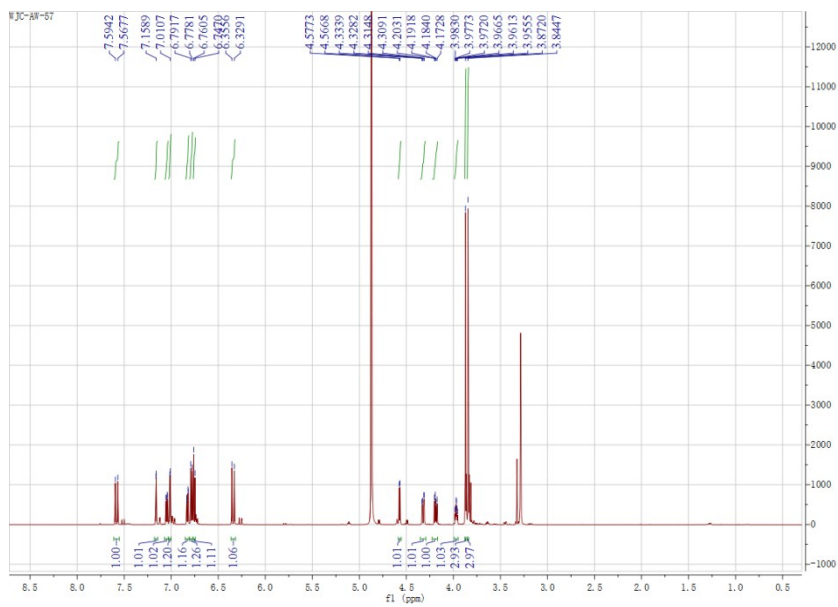

Figure S21.  $^{13}\text{C}$ -NMR spectrum (MeOD, 125 MHz) of 4

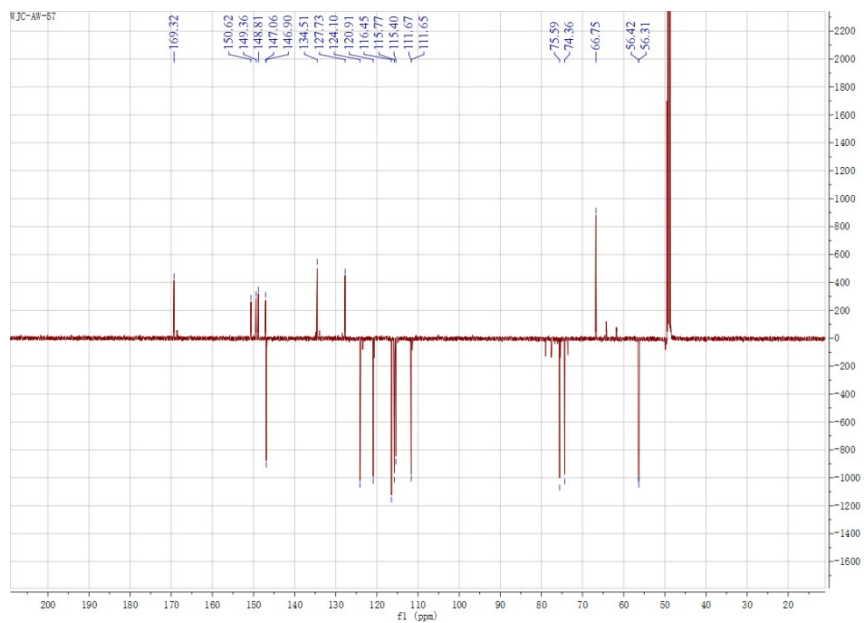



Figure S22.  $^1\text{H}$ - $^1\text{H}$  COSY spectrum (MeOD) of 4

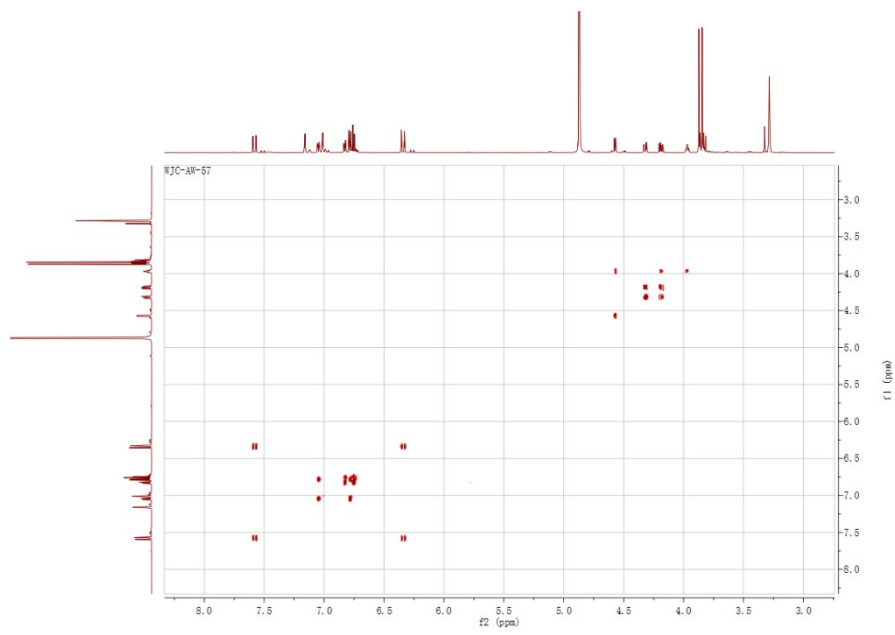

Figure S23. HSQC spectrum (MeOD) of 4

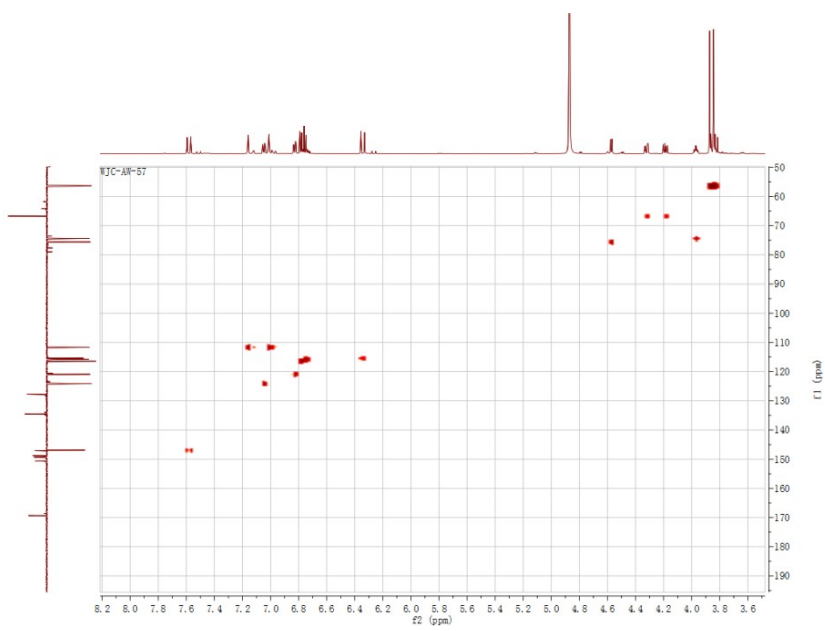

Figure S24. HMBC spectrum (MeOD) of 4

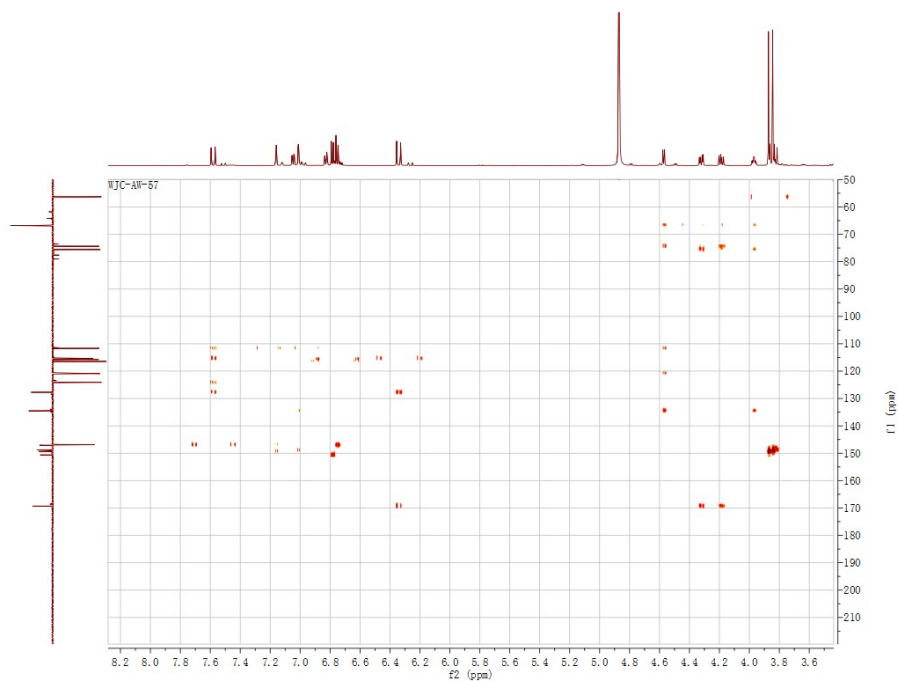

# MS, UV, IR and NMR Spectra of Compound 5

Figure S25. HR-ESI-MS spectrum of 5

AW-58\_170407112401 #1 RT: 0.00 AV: 1 NL: 1.14E7  
T: FTMS + p ESI Full ms [50.00-500.00]

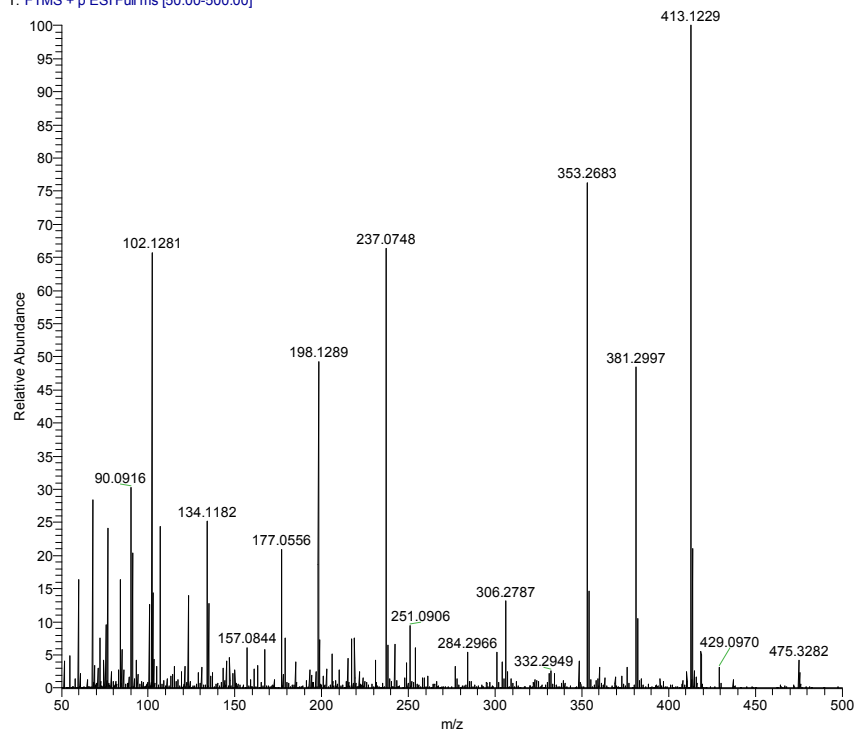

Figure S26. IR spectrum of 5

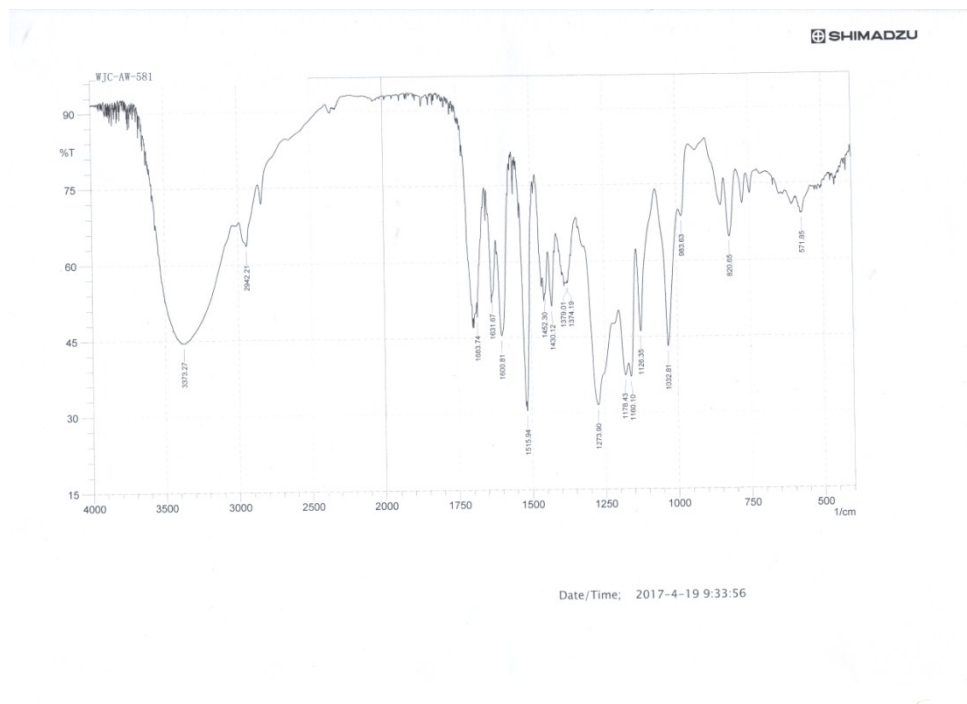

Figure S27. UV spectrum in MeOH of 5

**Spectrum Peak Pick Report**

2017-04-17 15:08:59

Data Set: Storage 150735 - RawData - D:\2017\WJC-AW-58.spc

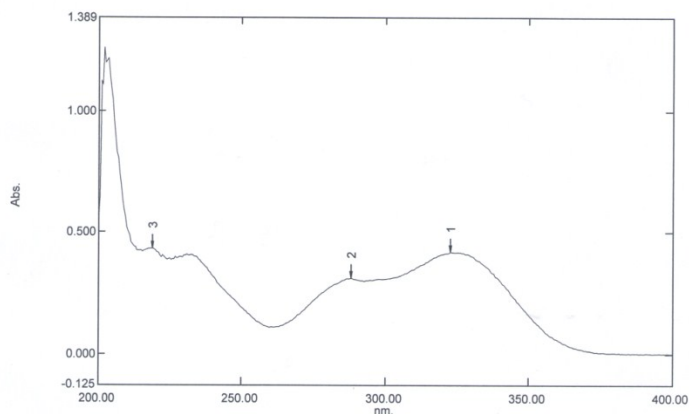

Measurement Properties  
 Wavelength Range (nm.): 200.00 to 400.00  
 Scan Speed: Medium  
 Sampling Interval: 0.5  
 Auto Sampling Interval: Disabled  
 Scan Mode: Single

| No. | P/V | Wavelength | Abs.  | Description |
|-----|-----|------------|-------|-------------|
| 1   | ⊕   | 323.00     | 0.420 |             |
| 2   | ⊕   | 288.00     | 0.312 |             |
| 3   | ⊕   | 219.00     | 0.434 |             |

Sample Preparation Properties  
 Weight:  
 Volume:  
 Dilution:  
 Path Length:  
 Additional Information:

Instrument Properties  
 Instrument Type: UV-2500PC Series  
 Measuring Mode: Absorbance  
 Slit Width: 1.0 nm  
 Light Source Change Wavelength: 360.0 nm  
 S/R Exchange: Normal

Attachment Properties  
 Attachment: 6-Cell  
 Number of cells: 6

*Handwritten notes:*  
 2017-04-17  
 WJC

Figure S28. <sup>1</sup>H-NMR spectrum (MeOD, 600 MHz) of 5

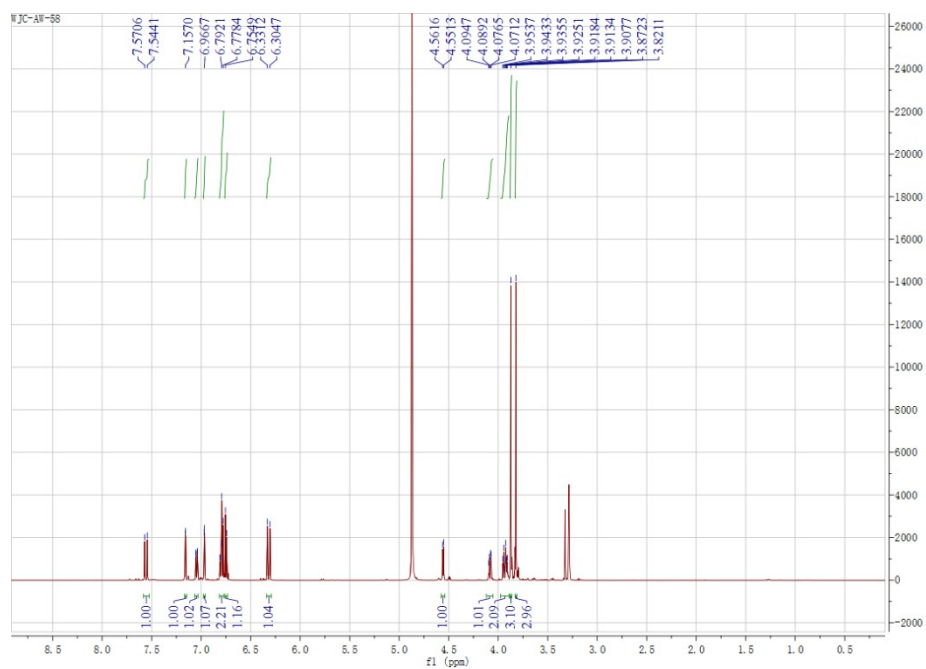

Figure S29.  $^{13}\text{C}$ -NMR spectrum (MeOD, 125 MHz) of 5

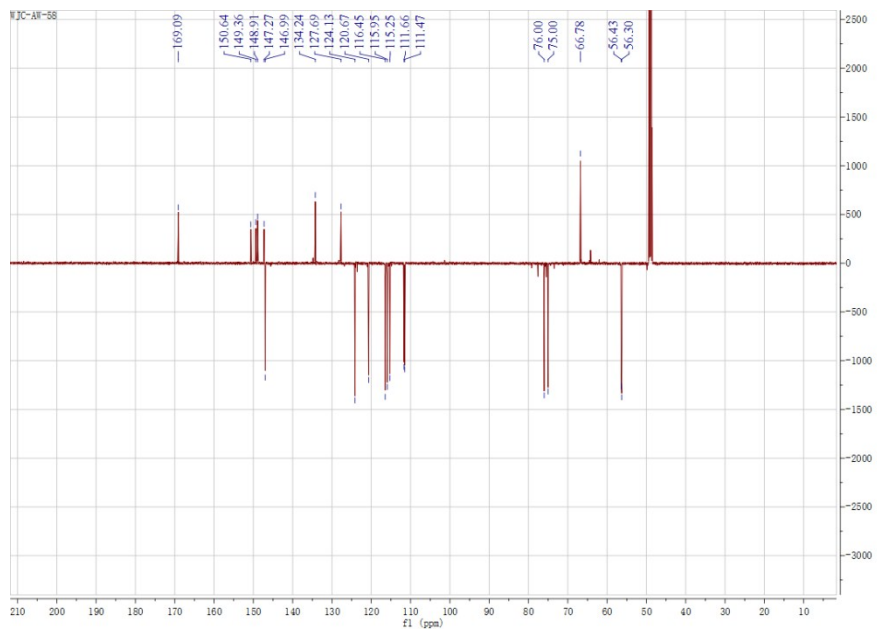

Supplement: c7ra13716h1.pdf [file c7ra13716h1.pdf]
